# Supplementary material for: Novel Coordination Mode in the Potassium Mefenamate Trihydrate Polymeric Structure
Source: MDPI journal article supplement (doi:10.3390/sym13101761), 2021-09-22
Supplement: s1 [file s1]

## Supplementary Materials

**Table S1.** Crystallographic data and refinement parameters for potassium mefenamate–water (1/3).

| Crystal data                                                                  |                                                                                       |
|-------------------------------------------------------------------------------|---------------------------------------------------------------------------------------|
| Chemical formula                                                              | {K(C <sub>15</sub> H <sub>14</sub> NO <sub>2</sub> )(H <sub>2</sub> O) <sub>3</sub> } |
| $M_r$                                                                         | 333.42                                                                                |
| Crystal system, space group                                                   | Monoclinic, $P2_1/c$                                                                  |
| Temperature (K)                                                               | 80(2)                                                                                 |
| $a$ (Å)                                                                       | 11.837(3)                                                                             |
| $b$ (Å)                                                                       | 35.406(9)                                                                             |
| $c$ (Å)                                                                       | 7.697(3)                                                                              |
| $\alpha$ (°)                                                                  |                                                                                       |
| $\beta$ (°)                                                                   | 91.53(3)                                                                              |
| $\gamma$ (°)                                                                  |                                                                                       |
| $V$ (Å <sup>3</sup> )                                                         | 3224.7(17)                                                                            |
| $Z$                                                                           | 8                                                                                     |
| Radiation type                                                                | Mo $K\alpha$                                                                          |
| Crystal size (mm)                                                             | 0.43 × 0.22 × 0.07                                                                    |
| Data collection                                                               |                                                                                       |
| Diffractometer                                                                | Xcalibur Ruby-CCD<br>$\kappa$ -geometry<br>diffractometer                             |
| No. of measured, independent<br>and observed [ $I > 2\sigma(I)$ ] reflections | <u>25361</u> , <u>8639</u> , <u>7053</u>                                              |
| $R_{int}$                                                                     | 0.025                                                                                 |
| Refinement                                                                    |                                                                                       |
| $R[F^2 > 2\sigma(F^2)]$ , $wR(F^2)$ , $S$                                     | <u>0.037</u> , <u>0.098</u> , <u>1.05</u>                                             |
| No. of parameters                                                             | 447                                                                                   |
| No. of restraints                                                             | 0                                                                                     |
| H-atom treatment                                                              | H atoms treated by a mixture of<br>independent and constrained<br>refinement          |
| $\Delta\rho_{max}$ , $\Delta\rho_{min}$ (e Å <sup>-3</sup> )                  | 0.40, -0.25                                                                           |

**Table S2.** Bond lengths in potassium mefenamate–water (1/3).

| Bonds in the chain formed with K1 ion |                 | Bonds in the chain formed with K2 ion |                 |
|---------------------------------------|-----------------|---------------------------------------|-----------------|
| Bond                                  | Bond length [Å] | Bond                                  | Bond length [Å] |
| K1–O2W                                | 2.7509(14)      | K2–O4W                                | 2.7782(14)      |
| K1–O3W                                | 2.7265(13)      | K2–O6W                                | 2.7139(13)      |
| K1–O1A                                | 2.7938(12)      | K2–O1B                                | 2.8163(12)      |
| K1–O1W <sup>vi</sup>                  | 2.7988(12)      | K2–O4W <sup>vi</sup>                  | 2.7856(15)      |
| K1–O2W <sup>vi</sup>                  | 2.8256(14)      | K2–O6W <sup>ii</sup>                  | 2.8250(12)      |
| K1–O3W <sup>ii</sup>                  | 3.0639(13)      | K2–O5W <sup>vi</sup>                  | 2.8431(12)      |
| K1–O1W                                | 3.3033(15)      | K2–O5W                                | 3.2332(15)      |
| K1...K1 <sup>ii</sup>                 | 4.0263(14)      | K2...K2 <sup>ii</sup>                 | 3.9858(15)      |
| K1...K1 <sup>vi</sup>                 | 4.0262(14)      | K2...K2 <sup>vi</sup>                 | 3.9858(15)      |
| O1A–C1A                               | 1.2736(16)      | O1B–C1B                               | 1.2657(15)      |
| O21A–C1A                              | 1.275(18)       |                                       |                 |
| O2A–C1A                               | 1.264(2)        | O2B–C1B                               | 1.2702(16)      |
| C1A–C2A                               | 1.5106(19)      | C1B–C2B                               | 1.5090(18)      |
| C2A–C3A                               | 1.4184(18)      | C2B–C3B                               | 1.4210(18)      |
| C2A–C7A                               | 1.4003(19)      | C2B–C7B                               | 1.4010(18)      |
| N1A–C3A                               | 1.3986(17)      | N1B–C3B                               | 1.3955(17)      |
| N1A–C8A                               | 1.4281(16)      | N1B–C8B                               | 1.4301(16)      |
| C3A–C4A                               | 1.4062(19)      | C3A–C4A                               | 1.4070(18)      |
| C4A–C5A                               | 1.3873(19)      | C4B–C5B                               | 1.3838(19)      |
| C5A–C6A                               | 1.3969(19)      | C5B–C6B                               | 1.3988(19)      |
| C6A–C7A                               | 1.3862(19)      | C6B–C7B                               | 1.3876(19)      |

|           |            |           |            |
|-----------|------------|-----------|------------|
| C8A–C9A   | 1.4022(19) | C8B–C9B   | 1.4012(19) |
| C8A–C13A  | 1.3989(17) | C8B–C13B  | 1.3988(18) |
| C9A–C10A  | 1.4094(18) | C9B–C10B  | 1.4104(18) |
| C9A–C14A  | 1.5127(18) | C9B–C14B  | 1.5083(18) |
| C10A–C11A | 1.3938(19) | C10B–C11B | 1.3954(19) |
| C10A–C17A | 1.509(2)   | C10B–C15B | 1.508(2)   |
| C11A–C12A | 1.391(2)   | C11B–C12B | 1.388(2)   |
| C12A–C13A | 1.3892(19) | C12B–C13B | 1.3885(19) |

---

Symmetry codes: ii = x, -y+3/2, z-1/2; vi = x, -y+3/2, z+1/2.

**Table S3.** Selected angles for potassium mefenamate–water (1/3).

| Angles in the chain formed with K1 ion |           | Angles in the chain formed with K2 ion |           |
|----------------------------------------|-----------|----------------------------------------|-----------|
|                                        | Angle [°] |                                        | Angle [°] |
| O3W–K1–O2W                             | 161.64(3) | O6W–K2–O4W                             | 160.94(4) |
| O3W–K1–O1A                             | 70.75(4)  | O6W–K2–O1B                             | 73.25(4)  |
| O2W–K1–O1A                             | 112.66(4) | O4W–K2–O1B                             | 117.99(4) |
| O3W–K1–O1W <sup>vi</sup>               | 89.55(4)  | O6W–K2–O5W <sup>vi</sup>               | 85.71(4)  |
| O2W–K1–O1W <sup>vi</sup>               | 103.53(3) | O4W–K2–O5W <sup>vi</sup>               | 102.75(4) |
| O1A–K1–O1W                             | 50.87(3)  | O1B–K2–O5W                             | 52.33(3)  |
| O1A–K1–O1W <sup>vi</sup>               | 117.93(3) | O1B–K2–O5W <sup>vi</sup>               | 111.08(3) |
| O3W–K1–O2W <sup>vi</sup>               | 84.86(4)  | O6W–K2–O4W <sup>vi</sup>               | 78.59(4)  |
| O2W–K1–O2W <sup>vi</sup>               | 88.15(4)  | O4W–K2–O4W <sup>vi</sup>               | 87.53(4)  |
| O3W–K1–O3W <sup>ii</sup>               | 118.22(4) | O6W–K2–O6W <sup>vi</sup>               | 121.79(4) |
| O1W–K1–O1W <sup>vi</sup>               | 131.43(3) | O5W–K2–O5W <sup>vi</sup>               | 136.35(3) |

|             |            |             |            |
|-------------|------------|-------------|------------|
| O2A–C1A–O1A | 123.31(13) | O1B–C1B–O2B | 122.83(12) |
| O2A–C1A–C2A | 118.84(13) | O2B–C1B–C2B | 118.74(11) |
| O1A–C1A–C2A | 117.84(12) | O1B–C1B–C2B | 118.41(11) |
| N1A–C3A–C4A | 121.86(12) | N1B–C3B–C4B | 121.13(12) |
| N1A–C3A–C2A | 118.95(12) | N1B–C3B–C2B | 119.61(12) |
| C3A–N1A–C8A | 124.29(11) | C3B–N1B–C8B | 124.66(11) |

---

Symmetry codes: ii = x, -y+3/2, z-1/2; vi = x, -y+3/2, z+1/2.

**Table S4.** Geometry of the hydrogen bonds in potassium mefenamate–water (1/3).

| D–H...A                       | D–H [Å]   | H...A [Å] | D...A [Å]  | D–H...A [Å] |
|-------------------------------|-----------|-----------|------------|-------------|
| N1A–H1NA...O2A                | 0.914(17) | 1.836(17) | 2.6072(18) | 140.5(14)   |
| N1A–H1NA...O21A               | 0.914(17) | 1.95(3)   | 2.648(18)  | 131.6(16)   |
| N1B–H1NB...O2B                | 0.902(17) | 1.915(17) | 2.6158(16) | 133.1(14)   |
| O1W–H1W1...N1B <sup>i</sup>   | 0.870(19) | 2.144(19) | 2.9958(17) | 166.2(16)   |
| O2W–H2W1...O2B <sup>i</sup>   | 0.874(18) | 2.077(18) | 2.9487(16) | 174.6(17)   |
| O2W–H2W2...O1B <sup>ii</sup>  | 0.88(2)   | 2.03(2)   | 2.8813(15) | 162.7(17)   |
| O3W–H3W2...O1W <sup>iii</sup> | 0.848(19) | 1.950(19) | 2.7737(18) | 163.8(17)   |
| O4W–H4W1...O1A <sup>iv</sup>  | 0.87(2)   | 1.94(2)   | 2.7992(16) | 169.0(17)   |
| O4W–H4W2...O3W <sup>v</sup>   | 0.828(19) | 2.10(2)   | 2.8916(16) | 160.2(17)   |
| O5W–H5W2...N1A <sup>v</sup>   | 0.867(19) | 2.15(2)   | 2.9944(17) | 165.4(16)   |
| O6W–H6W1...O5W <sup>iii</sup> | 0.874(18) | 1.984(18) | 2.8137(18) | 158.3(16)   |

---

Symmetry codes: i = x, y, z-1; ii = x, -y+3/2, z-1/2; iii = x, y, z+1; iv = x+1, -y+3/2, z+1/2; v = x+1, y, z.

**Table S5.** Selected QTAIM parameters (in a.u.) for the coordination polymers of potassium mefenamate–water (1/3).

|               |                        | Bond<br>length<br>[Å] | q(r)    | ∇ <sup>2</sup> (r) | ε(r)   | V(r)    | G(r)   | H(r)   | d [Å]          | δ(A,B) | %δ(A,B)<br>%K |
|---------------|------------------------|-----------------------|---------|--------------------|--------|---------|--------|--------|----------------|--------|---------------|
| Binding to K1 | K1 – O1W <sup>vi</sup> | 2.7988                | 0.0142  | 0.0613             | 0.1319 | -0.0118 | 0.0135 | 0.0018 | 0.0013         | 0.0764 | 0.2111        |
|               | K2 – O3W <sup>ii</sup> | 3.0640                | 0.0063  | 0.0304             | 0.0596 | -0.0048 | 0.0062 | 0.0014 | 0.0047         | 0.0400 | 0.1106        |
|               | K1 – O3W               | 2.7265                | 0.0165  | 0.0713             | 0.0857 | -0.0138 | 0.0158 | 0.0020 | 0.0055         | 0.0977 | 0.2010        |
|               | K1 – O2W <sup>vi</sup> | 2.8259                | 0.0141  | 0.0582             | 0.0779 | -0.0116 | 0.0131 | 0.0015 | 0.0010         | 0.0766 | 0.2116        |
|               | K1 – O1A               | 2.7937                | 0.0148  | 0.0612             | 0.0502 | -0.0121 | 0.0137 | 0.0016 | 0.0035         | 0.1049 | 0.2898        |
|               | K1 – O1W               | 3.3031                | 0.0048  | 0.0213             | 0.7547 | -0.0031 | 0.0042 | 0.0011 | 0.0024         |        |               |
|               | K1 – O2W               | 2.7512                | 0.0161  | 0.0694             | 0.0876 | -0.0137 | 0.0155 | 0.0018 | 0.0006         | 0.0939 | 0.2594        |
|               | K1 – C6B               | 3.3992                | 0.0057  | 0.0190             | 1.2683 | -0.0029 | 0.0038 | 0.0009 | 0.2335         |        |               |
|               |                        | q(A)                  | λ(A)    | %λ(A)              |        |         |        |        |                |        |               |
|               | K1                     | 0.9108                | 17.8318 | 98.5770            |        |         |        |        |                |        |               |
|               | O1A                    | -1.2508               | 8.3327  | 90.0762            |        |         |        |        |                |        |               |
|               | O2W                    | -1.2193               | 8.4901  | 92.0896            |        |         |        |        |                |        |               |
|               | O3W                    | -1.2877               | 8.5698  | 92.2699            |        |         |        |        |                |        |               |
|               | O2W                    | -1.2913               | 8.5278  | 91.7827            |        |         |        |        |                |        |               |
|               | O2W <sup>vi</sup>      | -1.219                | 8.4745  | 91.9241            |        |         |        |        |                |        |               |
|               | O3W <sup>ii</sup>      | -1.3265               | 8.4165  | 92.3660            |        |         |        |        |                |        |               |
|               |                        | Bond<br>length<br>[Å] | q(r)    | ∇ <sup>2</sup> (r) | ε(r)   | V(r)    | G(r)   | H(r)   | BPL -<br>GBL_I | δ(A,B) | %δ(A,B)<br>%K |
| Binding to K2 | K2 – O1B               | 2.8162                | 0.0141  | 0.0580             | 0.0446 | -0.0114 | 0.0130 | 0.0015 | 0.0034         | 0.0987 | 0.273         |
|               | K2 – O5W <sup>vi</sup> | 2.8432                | 0.0124  | 0.0543             | 0.1251 | -0.0101 | 0.0118 | 0.0017 | 0.0022         | 0.0663 | 0.1833        |
|               | K2 – O4W               | 2.7785                | 0.0154  | 0.0654             | 0.0761 | -0.0129 | 0.0146 | 0.0017 | 0.0003         | 0.0894 | 0.2472        |
|               | K2 – O6W               | 2.7138                | 0.0163  | 0.0728             | 0.1026 | -0.0137 | 0.0160 | 0.0022 | 0.0056         | 0.0947 | 0.2618        |

|                        |        |        |        |        |         |        |        |        |        |        |
|------------------------|--------|--------|--------|--------|---------|--------|--------|--------|--------|--------|
| K2 – O4W <sup>vi</sup> | 2.7862 | 0.0150 | 0.0635 | 0.0869 | -0.0125 | 0.0142 | 0.0017 | 0.0021 | 0.0799 | 0.2207 |
| K2 – O5W               | 3.2330 | 0.0056 | 0.0241 | 0.2585 | -0.0038 | 0.0049 | 0.0011 | 0.0035 |        |        |
| K2 – C6A               | 3.5152 | 0.0045 | 0.0149 | 1.2019 | -0.0022 | 0.0030 | 0.0008 | 0.2703 |        |        |
| K2 – O6W <sup>ii</sup> | 2.8251 | 0.0136 | 0.0582 | 0.0832 | -0.0113 | 0.0129 | 0.0016 | 0.0020 | 0.0663 | 0.1833 |

|                   | q(A)    | λ(A)    | %λ(A)   |
|-------------------|---------|---------|---------|
| K2                | 0.9111  | 17.8268 | 98.5509 |
| O1B               | -1.2554 | 8.3337  | 90.0422 |
| O4W               | -1.2233 | 8.4942  | 90.0954 |
| O6W               | -1.2784 | 8.5412  | 92.0543 |
| O4W <sup>iv</sup> | -1.2224 | 8.4819  | 91.9711 |
| O5W <sup>iv</sup> | -1.2919 | 8.5398  | 91.9057 |
| O6W <sup>ii</sup> | -1.3868 | 8.5888  | 92.1858 |
| C6A               | -1.2169 | 8.2368  | 89.3657 |
| O5W               | 1.5617  | 2.7819  | 62.6791 |

| K1 [7] |                       | Bond<br>length |        |        |        |         |        |        |        | BPL -  | %δ(A,B) |  |
|--------|-----------------------|----------------|--------|--------|--------|---------|--------|--------|--------|--------|---------|--|
|        |                       | [Å]            | ρ(r)   | ∇²(r)  | ε(r)   | V(r)    | G(r)   | H(r)   | GBL_I  | δ(A,B) | %K      |  |
|        | K1 – C7 <sup>v</sup>  | 3.2877         | 0.0071 | 0.0263 | 5.2196 | -0.0040 | 0.0053 | 0.0013 | 0.1935 | 0.026  | 0.0717  |  |
|        | K1 – O1 <sup>ix</sup> | 2.8702         | 0.0125 | 0.0520 | 0.0483 | -0.0093 | 0.0112 | 0.0019 | 0.0006 | 0.0712 | 0.1965  |  |
|        | K1 – O2               | 2.8842         | 0.0131 | 0.0523 | 0.2397 | -0.0098 | 0.0114 | 0.0017 | 0.0007 | 0.073  | 0.2015  |  |
|        | K1 – O3               | 2.7982         | 0.0143 | 0.0640 | 0.0854 | -0.0111 | 0.0135 | 0.0025 | 0.0019 | 0.08   | 0.2207  |  |
|        | K1 – O3 <sup>x</sup>  | 2.7688         | 0.0161 | 0.0691 | 0.0580 | -0.0125 | 0.0149 | 0.0024 | 0.0003 | 0.09   | 0.2484  |  |
|        | K1 – O1               | 2.6983         | 0.0194 | 0.0823 | 0.0364 | -0.0157 | 0.0181 | 0.0024 | 0.0005 | 0.1069 | 0.2951  |  |

|                  | q(A)    | λ(A)    | %λ(A)   |
|------------------|---------|---------|---------|
| K1               | 0.8868  | 17.8198 | 98.3802 |
| O1               | -1.2803 | 8.2989  | 89.4253 |
| O2               | -1.2414 | 8.3125  | 89.9480 |
| O1 <sup>ix</sup> | -1.2668 | 8.2788  | 89.3377 |

|                 |         |        |         |
|-----------------|---------|--------|---------|
| O3              | -1.2599 | 8.4931 | 91.7196 |
| O3 <sup>x</sup> | -1.2549 | 8.4876 | 91.7088 |
| C7              | 0.1311  | 3.7967 | 64.6915 |

d [Å]—the difference between the length of the bond path and the distance between the atoms linked by this bond.

Symmetry codes: ii= x, -y+3/2, z-1/2; v = x+1, y, z; vi = x, -y+3/2, z+1/2; viii = x+1, y, z+1; ix = 2-x, 1-y, 1-z; x = 3-x, 1-y, 1-z
